# Supplementary material
Source: publisher figshare collection journal article supplement (https://tandf.figshare.com/articles/dataset/_/5576407)
Supplement: Supplementary file 2 [file 1]

## Supplementary Information

### The taxonomic position and breeding range of Golden Nightjar *Caprimulgus eximius* (Aves: Caprimulgidae)

Yvonne Lawrie, Robert Swann, Peter Stronach, Yoav Perlman and J Martin Collinson  
Ostrich 2017. DOI: 10.2989/00306525.2017.1279691

**Supplementary Figure S1:** (a) Maximum likelihood tree based on 771 bp of cytb sequence to resolve position of Nubian Nightjar ('CNT01') relative to Golden Nightjar ('CEX01'). Alignments and phylogenetic reconstructions were performed with CLC Sequence Viewer (<http://www.clcbio.com/products/clc-sequence-viewer/>), PhyML (Dereeper et al., 2008) and TreeDyn (Chevenet et al., 2006) online using the South of France Bioinformatics Platform (<http://www.atgc-montpellier.fr/index.php?type=pg>). (b) Bayesian Inference tree using the same dataset with Golden, Egyptian and Nubian Nightjar *C. n. tamaricis* highlighted in red. See main text for details.

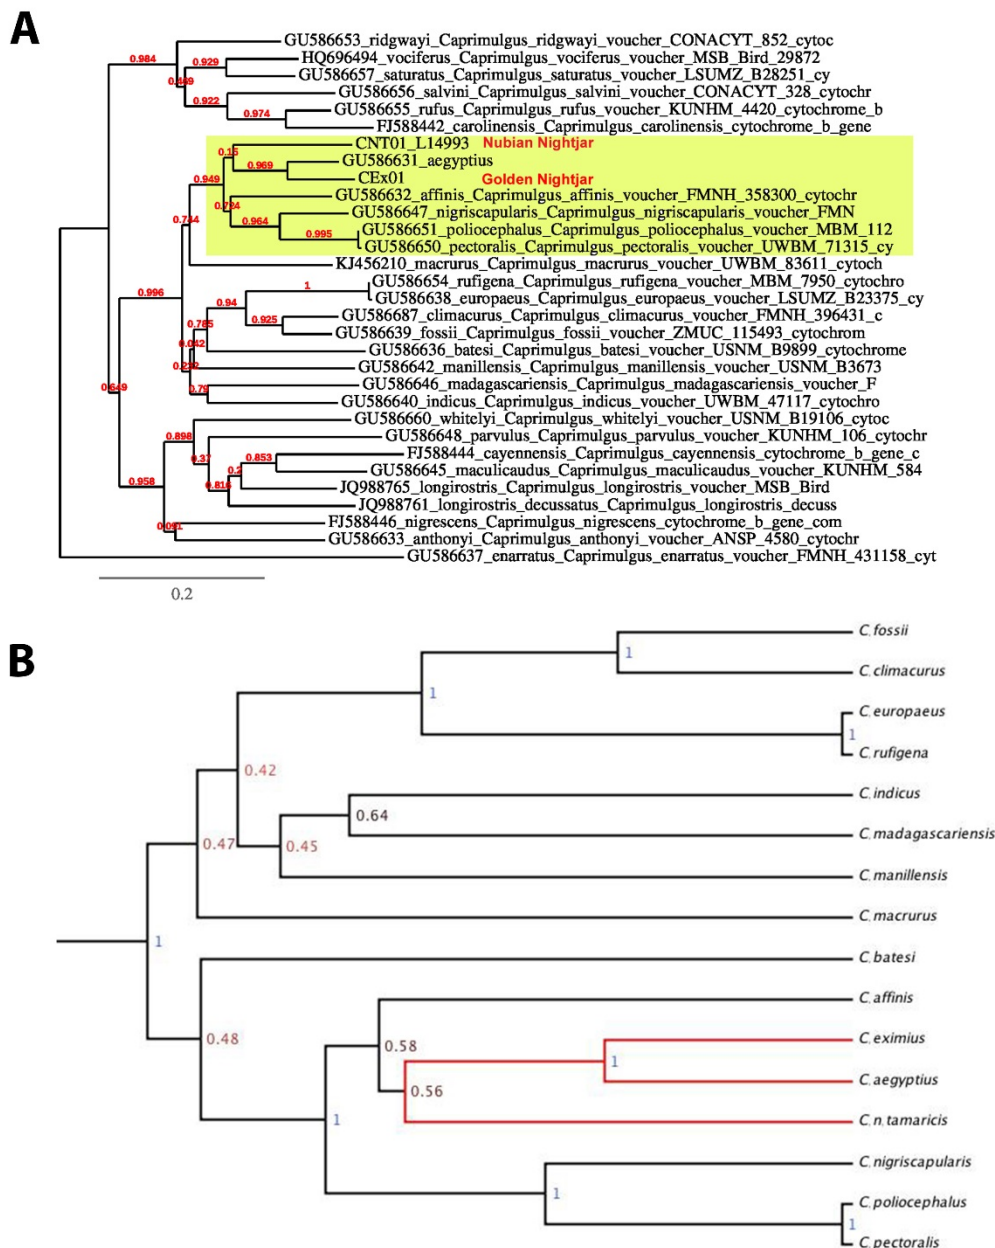

**Supplementary Figure S2:** Bayesian inference tree based on 1703 bp concatemer of cytb and COI for all relevant species for which both sequences were available. See main text for methodology.

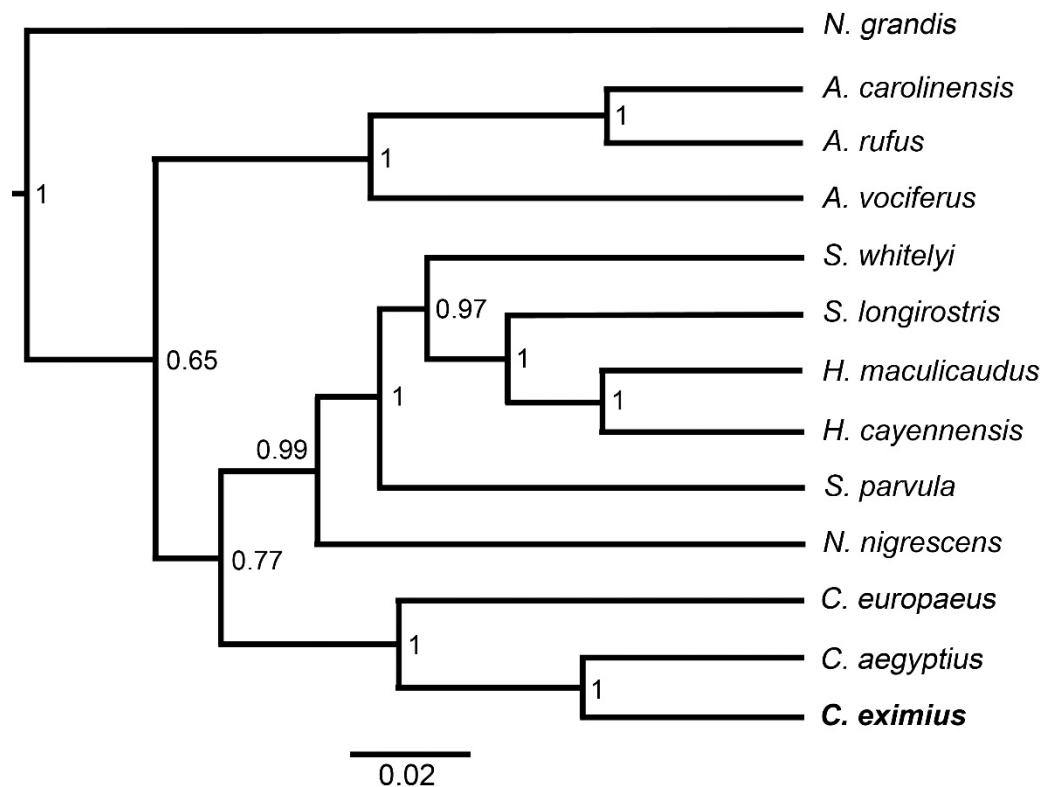

### Nubian Nightjar *Caprimulgus nubicus*

Partial cytb sequence will be completed and uploaded to GenBank as part of a future study of the systematics of this species.

TCTAGATCTGCCTAGCAACACAAATCCTAACCGGACTACTACTAGCTACACATTACACCGCAGACACAACCCTG  
GCCTTCTCATCTGTTGCCACACTTGCCGAAACGTACAATACGGCTGACTAATCCGTAATCTGCACGCAAATGG  
AGCCTCACTCTTCTTCATTTGCATTTACCTCCACATTGGACGAGGCCTATACTACGGATCCTACCTCTACAAAGA  
AACCTGAAACACAGGAGTAATCCTCTTACTCACCTTAATAGCAACAGCCTTCGTAGGCTACGTCTACCATGAG  
GACAAATATCATTCTGAGGGGCTACAGTCATCACCAACCTATTCTCAGCTATCCCATATATTGGCCAAACCCTT  
GTAGAATGAGCATGAGGTGGATTTTCCGTAGACAACCCACACTAACCCGATTTTTTGCCTACACTTCCTCTCT  
TCCCTTTATAATTGCCGGCCTCACCTAATCCACCTAACATTCTCCATGAATCTGGCTCAAACAACCCCTCGG  
AATTGTATCAAACCTGCGACAAAATTCCATTCCACCCCTATTTTTCCCTAAAAGACATCCTAGGCTTCGCACTAAT  
ACTACCCCATTAATAACACTCGCCATATTCGCCCAAACCTGCTAGGGGACCCAGAAAACCTTTACCCAGCAA  
ATCCCTAGTCACACCCCCACATATCAAACCCGAGTGATACTTCCTATTTGCATACGCCATCTTACGCTCAATCC  
CGAACAAACTAGGAGGTGTCCTAGCCC

### References

- Chevenet F, Brun C, Banuls AL, Jacq B, Chisten R. 2006. TreeDyn: towards dynamic graphics and annotations for analyses of trees. *BMC Bioinformatics* 7: 439.
- Dereeper A, Guignon V, Blanc G, Audic S, Buffet S, Chevenet F, Dufayard JF, Guindon S, Lefort V, Lescot M, Claverie JM, Gascuel O. 2008. Phylogeny.fr: robust phylogenetic analysis for the non-specialist. *Nucleic Acids Research* 36(Suppl. 2): W465–W469.
